# Supplementary material for: Plasma cathepsin D as an early indicator of alcohol-related liver disease
Source: PubMed Central journal article supplement (PMC11388167; doi:10.1016/j.jhepr.2024.101117), 2024-05-09
Supplement: mmc1.pdf [file mmc1.pdf]

# **Plasma cathepsin D as an early indicator of alcohol-related liver disease**

Mengying Li, Tom Houben, Albert V. Bitolina, Dennis M. Meesters, Mads  
Israelsen, Maria Kjærgaard, Ger H. Koek, Tim Hendrikx, Jef Verbeek,  
Aleksander Krag, Maja Thiele, Ronit Shiri-Sverdlov

## Table of contents

|               |    |
|---------------|----|
| Fig. S1.....  | 2  |
| Fig. S2.....  | 3  |
| Fig. S3.....  | 4  |
| Table S1..... | 5  |
| Table S2..... | 7  |
| Table S3..... | 8  |
| Table S4..... | 9  |
| Table S5..... | 10 |
| Table S6..... | 11 |
| Table S7..... | 12 |
| Table S8..... | 13 |

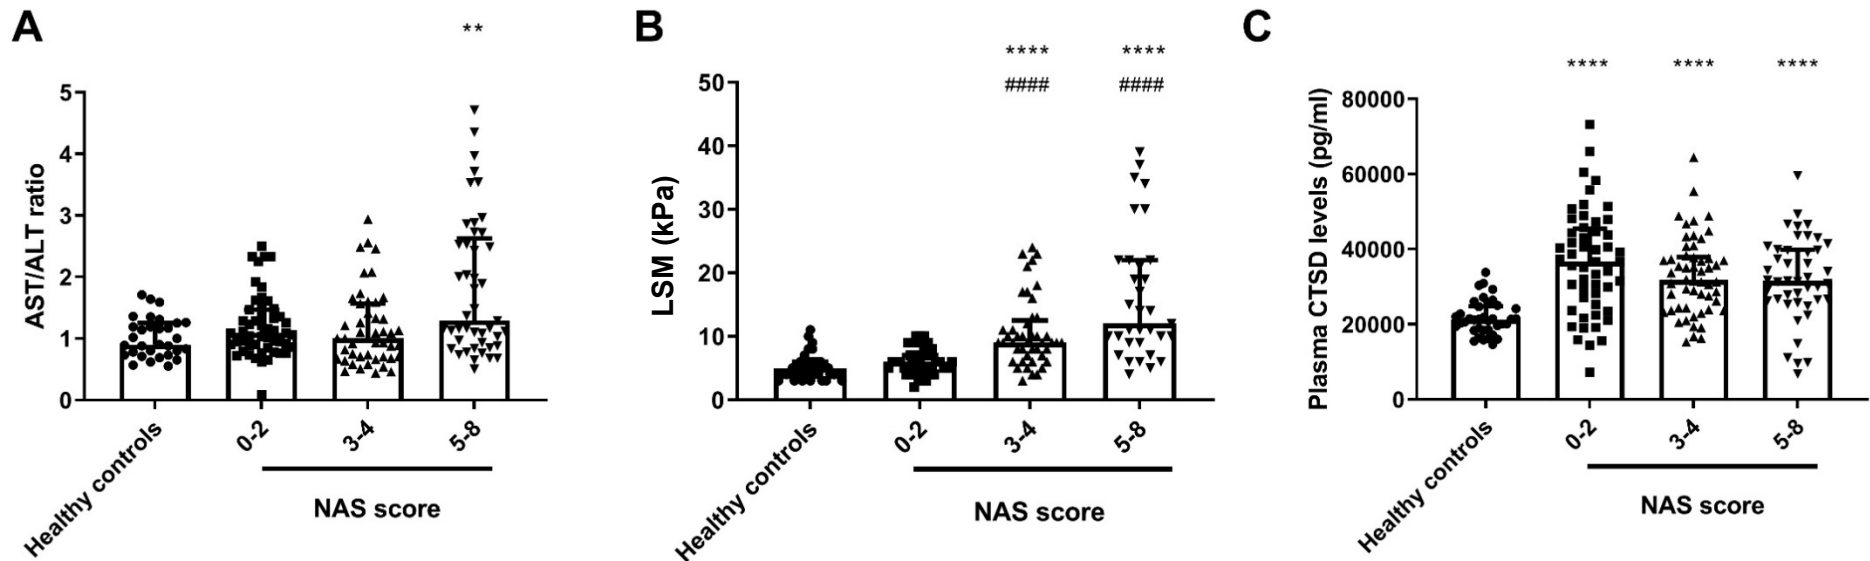

**Fig. S1: Plasma CTSD levels and hepatic disease markers increased in MetALD/ALD patients classified according to NAS score**

AST/ALT ratio, liver stiffness measurement (LSM) and CTSD levels were analyzed in healthy controls (n=40) and MetALD/ALD patients (n=152) and classified according to the NAFLD NAS-CRN system. The composite NAS score consisted of the sum of steatosis, ballooning and lobular inflammation. \*\* p<0.01, \*\*\*\* p<0.0001 compared to healthy controls and #### p<0.0001 compared to NAS score 0 (Kruskal-Wallis test). All error bars are median with interquartile range.

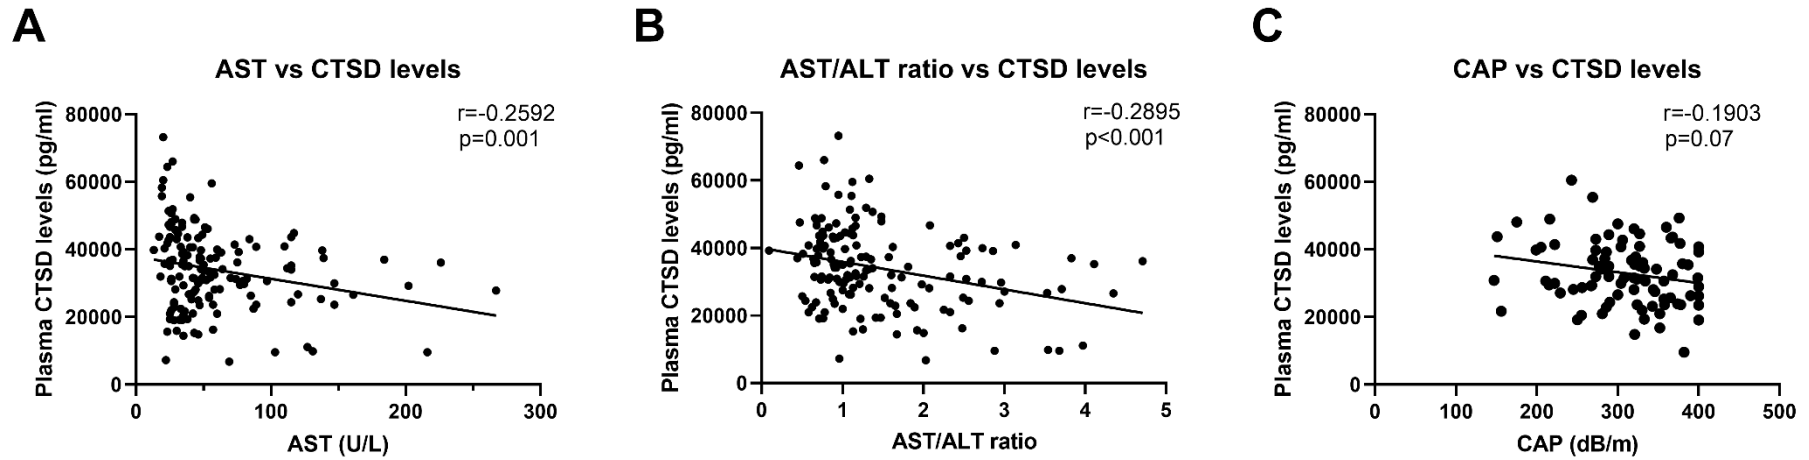

**Fig. S2: Plasma CTSD levels correlated with AST and AST/ALT ratio in MetALD/ALD patients.**

(A) Plasma CTSD levels vs. AST (n=148), (B) plasma CTSD levels vs. AST/ALT ratio (n=148) and (C) and plasma CTSD levels vs. CAP (n=89).

Spearman's correlation was performed.  $p < 0.05$  was considered statistically significant.

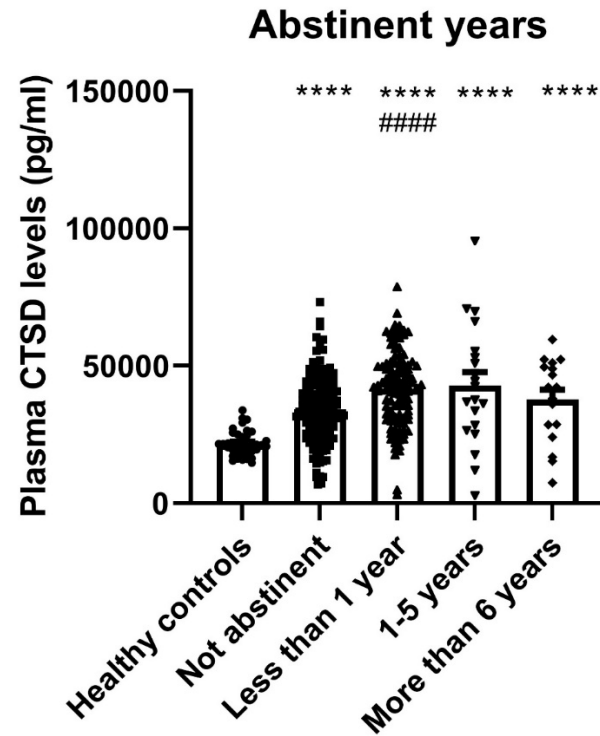

**Fig. S3: Plasma CTSD levels during prolonged periods of self-reported abstinence**

\*\*\*\*  $p < 0.0001$  compared to healthy controls and ####  $p < 0.0001$  compared to patients that were not abstinent (indicated in graph as ‘not abstinent’) (Kruskal-Wallis test). All error bars are median with interquartile range. (healthy controls,  $n=38$ ; not abstinent,  $n=156$ ; less than 1 year of abstinence,  $n=112$ ; 1-5 years of abstinence,  $n=20$ ; more than 6 years of abstinence,  $n=17$ )

**Table S1: Clinical characteristics of MetALD/ALD patients based on NAS score**

| Parameters                           | Healthy controls<br>(n=40) | NAS score 0<br>(n=20) | NAS score 1-<br>4<br>(n=86) | NAS score 5-<br>8<br>(n=45) | p-value<br>(score 0 vs.<br>healthy<br>controls) | p-value<br>(score 0 vs.<br>score 1-4) | p-value<br>(score 0 vs.<br>score 5-8) |
|--------------------------------------|----------------------------|-----------------------|-----------------------------|-----------------------------|-------------------------------------------------|---------------------------------------|---------------------------------------|
| <b>Gender (F/M)</b>                  | 9/31                       | 6/14                  | 19/67                       | 6/39                        | 0.535                                           | 0.458                                 | 0.165                                 |
| <b>Age (y)</b>                       | 53±1.6                     | 50±2.8                | 57±1.1                      | 58±1.4                      | 0.243                                           | 0.004*                                | 0.004*                                |
| <b>BMI (kg/m<sup>2</sup>)</b>        | 26±0.5                     | 26±1.0                | 28±0.7                      | 27±0.8                      | 0.546                                           | 0.054                                 | 0.186                                 |
| <b>HOMA-IR</b>                       | 2.8±0.4                    | 7.2±5.2               | 5.9±0.9                     | 7.0±1.1                     | 0.406                                           | 0.661                                 | 0.939                                 |
| <b>Insulin (pmol/L)</b>              | 69.4±8.0                   | 109.9±59.0            | 129.7±17.6                  | 134.0±15.4                  | 0.349                                           | 0.669                                 | 0.599                                 |
| <b>Fasting glucose<br/>(mmol/L)</b>  | 5.9±0.2                    | 6.4±0.4               | 7.0±0.2                     | 7.4±0.3                     | 0.194                                           | 0.228                                 | 0.091                                 |
| <b>Hemoglobin A1c<br/>(mmol/mol)</b> | 37±1.0                     | 38±2.8                | 37±1.2                      | 37±1.4                      | 0.918                                           | 0.977                                 | 0.756                                 |
| <b>LDL cholesterol<br/>(mmol/L)</b>  | 3.3±0.1                    | 2.8±0.2               | 2.8±0.1                     | 2.6±1.1                     | 0.056                                           | 0.989                                 | 0.393                                 |
| <b>HDL cholesterol<br/>(mmol/L)</b>  | 1.3±0.08                   | 1.4±0.11              | 1.5±0.06                    | 1.5±0.11                    | 0.796                                           | 0.430                                 | 0.306                                 |
| <b>Triglyceride<br/>(mmol/L)</b>     | 1.3±0.1                    | 1.8±0.2               | 2.2±0.2                     | 1.4±0.1                     | 0.043*                                          | 0.482                                 | 0.098                                 |

|                                       |                  |                  |                      |                      |        |        |        |
|---------------------------------------|------------------|------------------|----------------------|----------------------|--------|--------|--------|
| <b>CAP (dB/m)</b>                     | 270±9            | 227±25           | 313±8                | 314±11               | 0.070  | 0.001* | 0.001* |
| <b>ALT (U/L)</b>                      | 31±3             | 26±3             | 49±5                 | 58±4                 | 0.329  | 0.040* | 0.000* |
| <b>AST (U/L)</b>                      | 28±2             | 27±2             | 47±3                 | 91±8                 | 0.895  | 0.000* | 0.000* |
| <b>AST/ALT ratio</b>                  | 1.01±0.06        | 1.16±0.09        | 1.30±0.09            | 1.82±0.17            | 0.148  | 0.273  | 0.001* |
| <b>LSM (kPa)</b>                      | 7.0±1.5          | 5.4±0.5          | 13.6±1.6             | 27.5±3.7             | 0.471  | 0.000* | 0.000* |
| <b>MELD</b>                           | 6.7±0.1          | 6.6±0.2          | 7.2±0.2              | 8.0±0.3              | 0.498  | 0.208  | 0.002* |
| <b>CRP (mg/L)</b>                     | 3.2±0.5          | 3.6±1.5          | 7.4±2.7              | 10.8±2.4             | 0.744  | 0.541  | 0.014* |
| <b>Plasma CTSD levels<br/>(pg/mL)</b> | 22858.54±1059.15 | 37737.03±3403.45 | 33949.17±<br>1235.81 | 32189.32±<br>1663.63 | 0.000* | 0.215  | 0.104  |

Data are represented as mean ± SEM. Data are statistically analysed by performing an independent sample t-test using SPSS software, version 27.0 (SPSS, Chicago, IL, USA). BMI: body mass index; HOMA-IR: homeostasis model of insulin resistance; LDL: low-density lipoprotein; HDL: high-density lipoprotein; CAP: controlled attenuation parameter; ALT: alanine transaminase; AST: aspartate transaminase; LSM: liver stiffness measurement; MELD: model of end stage liver disease; CRP: C-reactive protein. \* p<0.05 is statistically significant.

**Table S2: Plasma CTSD levels independently associated with plasma triglycerides in NAS score 0 MetALD/ALD patients and healthy controls**

| <b>Dependent variable: plasma CTSD levels</b> |                |                                                     |                          |                     |                                                     |                          |
|-----------------------------------------------|----------------|-----------------------------------------------------|--------------------------|---------------------|-----------------------------------------------------|--------------------------|
| <b>LDL cholesterol</b>                        |                |                                                     |                          | <b>Triglyceride</b> |                                                     |                          |
| <b>Models</b>                                 | <b>p value</b> | <b>Standardized coefficients <math>\beta</math></b> | <b>Adjusted R square</b> | <b>p value</b>      | <b>Standardized coefficients <math>\beta</math></b> | <b>Adjusted R square</b> |
| <b>Model 1</b>                                | 0.242          | -0.156                                              | 0.007                    | 0.030*              | 0.286                                               | 0.065                    |
| <b>Model 2</b><br>Model 1+age                 | 0.668          | -0.060                                              | 0.051                    | 0.034*              | 0.270                                               | 0.123                    |
| <b>Model 3</b><br>Model 2+BMI                 | 0.690          | -0.057                                              | 0.034                    | 0.026*              | 0.293                                               | 0.116                    |
| <b>Model 4</b><br>Model 3+sex                 | 0.698          | -0.055                                              | 0.025                    | 0.034*              | 0.285                                               | 0.103                    |

Data were analyzed by multiple linear regression: Model 1, simple regression; Model 2, model 1 + adjustment for age; Model 3, model 2 + adjustment for BMI; Model 4, model 3 + adjustment for sex. \*  $p < 0.05$  is statistically significant.

**Table S3: Plasma CTSD levels are associated with hepatic disease markers in MetALD/ALD patients**

**Dependent variable: plasma CTSD levels**

| Models                        | LSM     |                                   |                   | AST/ALT ratio |                                   |                   | AST     |                                   |                   | ELF     |                                   |                   | GGT     |                                   |                   |
|-------------------------------|---------|-----------------------------------|-------------------|---------------|-----------------------------------|-------------------|---------|-----------------------------------|-------------------|---------|-----------------------------------|-------------------|---------|-----------------------------------|-------------------|
|                               | p value | Standardized coefficients $\beta$ | Adjusted R square | p value       | Standardized coefficients $\beta$ | Adjusted R square | p value | Standardized coefficients $\beta$ | Adjusted R square | p value | Standardized coefficients $\beta$ | Adjusted R square | p value | Standardized coefficients $\beta$ | Adjusted R square |
| <b>Model 1</b>                | 0.005*  | -0.231                            | 0.047             | 0.000*        | -0.306                            | 0.087             | 0.004*  | -0.238                            | 0.050             | 0.045*  | -0.163                            | 0.020             | 0.052   | -0.158                            | 0.025             |
| <b>Model 2</b><br>Model 1+age | 0.007*  | -0.224                            | 0.049             | 0.000*        | -0.302                            | 0.086             | 0.003*  | -0.240                            | 0.052             | 0.072   | -0.151                            | 0.015             | 0.043*  | -0.165                            | 0.034             |
| <b>Model 3</b><br>Model 2+BMI | 0.007*  | -0.224                            | 0.042             | 0.000*        | -0.347                            | 0.093             | 0.002*  | -0.259                            | 0.050             | 0.070   | -0.154                            | 0.009             | 0.039*  | -0.173                            | 0.035             |
| <b>Model 4</b><br>Model 3+sex | 0.009*  | -0.218                            | 0.038             | 0.000*        | -0.344                            | 0.092             | 0.002*  | -0.259                            | 0.051             | 0.098   | -0.142                            | 0.008             | 0.045*  | -0.168                            | 0.043             |

Data were analysed by multiple linear regression: Model 1, simple regression; Model 2, model 1 + adjustment for age; Model 3, model 2 + adjustment for BMI; Model 4, model 3 + adjustment for sex. \*  $p < 0.05$  is statistically significant.



**Table S4: Overview of the comparison between the different single AUCs**

|                               | Standard Error <sup>a</sup> | z statistic | 95% Confidence Interval <sup>b</sup> | P-value  |
|-------------------------------|-----------------------------|-------------|--------------------------------------|----------|
| CTSD levels vs. AST/ALT ratio | 0.0702                      | 2.689       | 0.0512 - 0.326                       | P=0.0072 |
| CTSD levels vs. TE            | 0.0609                      | 0.664       | -0.0789 - 0.160                      | P=0.5070 |
| AST/ALT ratio vs. TE          | 0.0728                      | 2.037       | 0.00561 - 0.291                      | P=0.0416 |

<sup>a</sup> DeLong et al., 1988

<sup>b</sup> Binomial exact

**Table S5: Different statistical criteria related to the diagnostic value of plasma CTSD, AST/ALT ratio and TE for distinguishing MetALD/ALD from healthy controls**

|               | Cut-off value           | Sensitivity % | Specificity % | PPV % | NPV % | LR+ | LR- | Accuracy% |
|---------------|-------------------------|---------------|---------------|-------|-------|-----|-----|-----------|
| CTSD levels   | $\geq 21933.10$ (pg/ml) | 87            | 68            | 92    | 53    | 2.7 | 0.2 | 83        |
| LSM           | $\geq 6.5$ (kPa)        | 69            | 74            | 92    | 34    | 2.7 | 0.4 | 70        |
| AST/ALT ratio | $\geq 1.37$             | 36            | 90            | 94    | 24    | 3.7 | 0.7 | 45        |

PPV: positive predictive value; NPV: negative predictive value; LR+: positive likelihood ratio; LR-: negative likelihood ratio.

**Table S6: Overview of the comparison between the different AUCs**

|                                                       | Standard Error <sup>a</sup> | z statistic | 95%<br>Confidence Interval <sup>b</sup> | P-value    |
|-------------------------------------------------------|-----------------------------|-------------|-----------------------------------------|------------|
| AST/ALT ratio vs. CTSD + AST/ALT ratio                | 0.0527                      | 4.609       | 0.140 - 0.346                           | P<0.0001   |
| LSM vs. CTSD + LSM                                    | 0.0418                      | 2.229       | 0.0113 - 0.175                          | P = 0.0258 |
| AST/ALT ratio + LSM vs. CTSD + AST/ALT<br>ratio + LSM | 0.0467                      | 3.717       | 0.0821 - 0.265                          | P = 0.0002 |

<sup>a</sup> DeLong et al., 1988

<sup>b</sup> Binomial exact

**Table S7: Different statistical criteria related to the diagnostic value of combining hepatic disease markers for distinguishing MetALD/ALD from healthy controls**

|                            | Sensitivity % | Specificity % | PPV % | NPV % | LR+  | LR- | Accuracy% |
|----------------------------|---------------|---------------|-------|-------|------|-----|-----------|
| CTSD + LSM + AST/ALT ratio | 85            | 84            | 96    | 55    | 5.3  | 0.2 | 85        |
| CTSD + LSM                 | 85            | 84            | 96    | 55    | 5.3  | 0.2 | 85        |
| CTSD + AST/ALT ratio       | 70            | 94            | 98    | 40    | 10.8 | 0.3 | 74        |
| AST/ALT ratio + LSM        | 47            | 94            | 97    | 28    | 7.3  | 0.6 | 55        |

PPV: positive predictive value; NPV: negative predictive value; LR+: positive likelihood ratio; LR-: negative likelihood ratio.

**Table S8: Plasma CTSD levels during prolonged periods of self-reported abstinence**

| Years of abstinence | Mean plasma CTSD levels<br>(pg/ml) | N   |
|---------------------|------------------------------------|-----|
| Healthy controls    | 21735.5                            | 38  |
| No abstinent        | 34100.3                            | 156 |
| Less than 1 year    | 41688.2                            | 112 |
| 1-5 years           | 42786.3                            | 20  |
| 6-10 years          | 30851.4                            | 7   |
| 11-20 years         | 50079.5                            | 6   |
| 21-30 years         | 43824.3                            | 2   |
| more than 30 years  | 18074.0                            | 2   |
| Total               | 37654.7                            | 305 |

Data are represented as mean
